# Supplementary material
Source: MDPI journal article supplement (https://www.mdpi.com/2072-4292/15/23/5564)
Supplement: s1 [file s1]

# Long-Term Detection of SPM Concentration and Water Colour in Gravel and Sand Pit Lakes through Landsat and Sentinel-2 Imagery

Nicola Ghirardi <sup>1,2,3\*</sup>, Monica Pinardi <sup>1</sup>, Daniele Nizzoli <sup>2</sup>, Pierluigi Viaroli <sup>2</sup>, Mariano Bresciani <sup>1</sup>

<sup>1</sup> CNR – Institute for Electromagnetic Sensing of the Environmental, Via A. Corti 12, 20133 Milan, Italy; ghirardi.n@irea.cnr.it (N.G.); bresciani.m@irea.cnr.it (M.B.); pinardi.m@irea.cnr.it (M.P.)

<sup>2</sup> Department of Chemistry, Life Sciences and Environmental Sustainability, University of Parma, Parco Area delle Scienze 33/A, 43124 Parma, Italy; nicola.ghirardi@unipr.it (N.G.); daniele.nizzoli@unipr.it (D.N.); pierluigi.viaroli@unipr.it (P.V.)

<sup>3</sup> CNR – Institute of BioEconomy, Via Madonna del Piano 10, 50019 Sesto Fiorentino, Italy; nicola.ghirardi@ibe.cnr.it

\* Correspondence: ghirardi.n@irea.cnr.it

## Supplementary Materials

|                        |                                                                         |
|------------------------|-------------------------------------------------------------------------|
| PLs                    | Pit lakes                                                               |
| SPM                    | Suspended Particulate Matter                                            |
| $\lambda_{\text{dom}}$ | Dominant wavelength                                                     |
| EO                     | Earth Observation                                                       |
| FUI                    | Forel-Ule Index                                                         |
| Rrs                    | Remote Sensing Reflectances                                             |
| VIS-NIR                | Visible-Near infrared                                                   |
| TO                     | Turin                                                                   |
| OR                     | Po and Orba River Park                                                  |
| MI                     | Milan                                                                   |
| TR                     | Trezzo sull'Adda                                                        |
| BS                     | Brescia                                                                 |
| MN                     | Mantua                                                                  |
| MO                     | Modena                                                                  |
| PO                     | Po River shaft                                                          |
| L5                     | Landsat-5                                                               |
| L7                     | Landsat-7                                                               |
| S2                     | Sentinel-2                                                              |
| TM                     | Thematic Mapper                                                         |
| ETM+                   | Enhanced Thematic Mapper                                                |
| VIS-SWIR               | Visible-Short Wavelength InfraRed                                       |
| MSI                    | MultiSpectral Instrument                                                |
| L1                     | Level-1                                                                 |
| WFD                    | Water Framework Directive                                               |
| DSF                    | Dark Spectrum Fitting                                                   |
| AOD <sub>550</sub>     | Aerosol Optical Depth at 550 nm                                         |
| $L_u$                  | Water radiance                                                          |
| $L_{\text{sky}}$       | Sky radiance                                                            |
| $E_d$                  | Downwelling irradiance                                                  |
| ROIs                   | Regions of Interest                                                     |
| $R^2$                  | Determination coefficient                                               |
| MAE                    | Mean Absolute Error                                                     |
| RMSE                   | Root Mean Square Error                                                  |
| MAPE                   | Mean Absolute Percentage Error                                          |
| SA                     | Spectral Angle                                                          |
| FWHM                   | Full Width Half Maximum                                                 |
| PLS <sub>low</sub>     | PLs characterized by low mean values of SPM and $\lambda_{\text{dom}}$  |
| PLS <sub>high</sub>    | PLs characterized by high mean values of SPM and $\lambda_{\text{dom}}$ |
| CDOM                   | Colored Dissolved Organic Matter                                        |

**Table S1.** Landsat-5 (L5, red), Landsat-7 (L7, blue) and Sentinel-2 (S2, green) satellite images processed for subsample pit lake analysis. Turin (TO), Po and Orba River Park (OR), Milan (MI), Trezzo sull'Adda (TR), Brescia (BS), Mantua (MN), Modena (MO), and along the Po River shaft (PO). The seasons follow the WFD protocol: winter (Win.; January 1 - March 20), spring (Spr.; April 1 - May 15), spring-summer (Spr. – Sum.; May 16 - June 15), summer (Sum.; July 1 - August 31), summer-autumn (Sum. – Aut.; September 1 - October 1) and autumn (Aut.; October 2 - November 31).

| Year | Season      | TO    | OR    | MI    | TR    | BS    | MN    | MO    | PO*           |
|------|-------------|-------|-------|-------|-------|-------|-------|-------|---------------|
| 1990 | Win.        | 23/02 | 23/02 | -     | -     | -     | -     | -     | -             |
|      | Spr.        | 12/04 | 12/04 | 12/04 | 12/04 | 07/05 | 07/05 | 07/05 | 07/05 + 30/04 |
|      | Spr. – Sum. | 15/06 | 15/06 | -     | -     | -     | -     | -     | -             |
|      | Sum.        | 02/08 | 02/08 | -     | -     | -     | -     | -     | -             |
|      | Sum. – Aut. | 10/09 | -     | -     | -     | -     | -     | -     | -             |
|      | Aut.        | 05/10 | 06/11 | -     | -     | -     | -     | -     | -             |
| 1994 | Win.        | -     | -     | -     | -     | -     | -     | 19/01 | 11/02 + 04/02 |
|      | Spr.        | 30/04 | 07/04 | 07/04 | 07/04 | 02/05 | 02/05 | 02/05 | 02/05 + NA    |
|      | Spr. – Sum. | -     | -     | -     | -     | -     | -     | 27/05 | 19/06 + 27/05 |
|      | Sum.        | -     | -     | -     | -     | -     | -     | 30/07 | 06/08 + 30/07 |
|      | Sum. – Aut. | -     | -     | -     | -     | -     | -     | 07/09 | 07/09 + NA    |
|      | Aut.        | -     | -     | -     | -     | -     | -     | 25/10 | -             |
| 1999 | Win.        | -     | 31/01 | 15/01 | 15/01 | 24/01 | 24/01 | -     | 25/02 + NA    |
|      | Spr.        | 05/04 | 05/04 | 05/04 | 05/04 | 29/03 | -     | 30/04 | 30/04 + NA    |
|      | Spr. – Sum. | -     | 23/05 | 23/05 | 23/05 | 01/06 | 01/06 | -     | 17/06 + 10/06 |
|      | Sum.        | -     | 26/07 | 26/07 | 26/07 | 04/08 | 04/08 | -     | 03/07 + 05/08 |
|      | Sum. – Aut. | -     | 12/09 | 12/09 | 12/09 | 13/09 | 14/09 | -     | 13/09 + 14/09 |
|      | Aut.        | -     | 23/11 | 23/11 | 23/11 | 24/11 | 07/10 | -     | 07/10 + 08/10 |
| 2000 | Win.        | 26/01 | 26/01 | -     | -     | -     | -     | -     | -             |
|      | Spr.        | 01/05 | 01/05 | 01/05 | 01/05 | 08/04 | 08/04 | 08/04 | 08/04 + 03/05 |
|      | Spr. – Sum. | 09/06 | 02/06 | -     | -     | -     | -     | -     | -             |
|      | Sum.        | 28/08 | 21/08 | -     | -     | -     | -     | -     | -             |
|      | Sum. – Aut. | 22/09 | 22/09 | -     | -     | -     | -     | -     | -             |
|      | Aut.        | 08/10 | 08/10 | -     | -     | -     | -     | -     | -             |
| 2003 | Win.        | -     | -     | -     | -     | -     | -     | 21/02 | 28/02 + 21/02 |
|      | Spr.        | 24/04 | 24/04 | 24/04 | 24/04 | 17/04 | 17/04 | 01/04 | 01/04 + NA    |
|      | Spr. – Sum. | -     | -     | -     | -     | -     | -     | 28/05 | 19/05 + 28/05 |
|      | Sum.        | -     | -     | -     | -     | -     | -     | 08/08 | 30/07 + 08/08 |
|      | Sum. – Aut. | -     | -     | -     | -     | -     | -     | 16/09 | 16/09 + 25/09 |
|      | Aut.        | -     | -     | -     | -     | -     | -     | 11/10 | -             |
| 2006 | Win.        | 10/02 | 10/01 | -     | -     | -     | -     | -     | -             |
|      | Spr.        | -     | 08/04 | 08/04 | 08/04 | 11/05 | 11/05 | 03/05 | 03/05 + NA    |
|      | Spr. – Sum. | 10/06 | 11/06 | -     | -     | -     | -     | -     | -             |
|      | Sum.        | 30/08 | 30/08 | -     | -     | -     | -     | -     | -             |
|      | Sum. – Aut. | -     | -     | -     | -     | -     | -     | -     | -             |
|      | Aut.        | 02/11 | 02/11 | -     | -     | -     | -     | -     | -             |
| 2007 | Win.        | -     | 05/01 | 15/02 | 30/01 | 30/01 | 06/01 | -     | -             |
|      | Spr.        | 27/04 | 27/04 | 20/04 | 20/04 | 20/04 | 20/04 | 20/04 | 20/04 + 29/04 |
|      | Spr. – Sum. | -     | -     | 22/05 | 30/05 | 30/05 | 22/05 | -     | -             |
|      | Sum.        | -     | 16/07 | 16/07 | 16/07 | 25/07 | 25/07 | -     | -             |
|      | Sum. – Aut. | -     | 18/09 | 02/09 | 02/09 | 11/09 | 12/09 | -     | -             |
|      | Aut.        | -     | 29/11 | 21/10 | 29/11 | -     | 21/10 | -     | -             |

|      |             |       |       |       |       |       |       |       |               |
|------|-------------|-------|-------|-------|-------|-------|-------|-------|---------------|
| 2008 | Win.        | -     | -     | -     | -     | -     | -     | 10/02 | 10/02 + 19/02 |
|      | Spr.        | 04/04 | 05/04 | 08/05 | 07/05 | -     | 08/05 | 08/05 | 08/05 + 09/05 |
|      | Spr. – Sum. | -     | -     | -     | -     | -     | -     | 10/06 | 09/06 + 10/06 |
|      | Sum.        | -     | -     | -     | -     | -     | -     | 20/07 | 11/07 + 04/07 |
|      | Sum. – Aut. | -     | -     | -     | -     | -     | -     | -     | -             |
|      | Aut.        | -     | -     | -     | -     | -     | -     | -     | -             |
| 2012 | Win.        | 11/01 | 11/01 | 11/01 | 11/01 | 21/02 | 21/02 | -     | 21/02 + 13/01 |
|      | Spr.        | 31/03 | -     | 31/03 | 31/03 | 25/04 | 25/04 | 04/05 | 11/05 + NA    |
|      | Spr. – Sum. | 25/05 | 19/06 | 19/06 | 19/06 | -     | 05/06 | -     | 27/05 + 21/06 |
|      | Sum.        | 22/08 | 22/08 | 22/08 | 22/08 | 15/08 | 30/07 | -     | 30/07 + 08/08 |
|      | Sum. – Aut. | 14/09 | 07/09 | 07/09 | 07/09 | 16/09 | 09/09 | -     | 16/09 + 09/09 |
|      | Aut.        | 25/10 | 25/10 | 09/10 | 09/10 | 02/10 | 02/10 | -     | 02/10 + NA    |
| 2014 | Win.        | -     | -     | -     | -     | -     | -     | 25/01 | 25/01 + NA    |
|      | Spr.        | 28/03 | -     | 06/04 | 06/04 | 15/04 | 01/05 | 01/05 | 01/05 + 24/04 |
|      | Spr. – Sum. | -     | -     | -     | -     | -     | -     | 11/06 | 17/05 + 11/06 |
|      | Sum.        | -     | -     | -     | -     | -     | -     | 05/08 | 05/08 + 14/08 |
|      | Sum. – Aut. | -     | -     | -     | -     | -     | -     | 06/09 | 06/09 + 15/09 |
|      | Aut.        | -     | -     | -     | -     | -     | -     | 24/10 | 24/10 + 02/11 |
| 2015 | Win.        | -     | -     | -     | -     | -     | -     | -     | -             |
|      | Spr.        | -     | -     | -     | -     | -     | -     | -     | -             |
|      | Spr. – Sum. | -     | -     | -     | -     | -     | -     | -     | -             |
|      | Sum.        | -     | 06/08 | 06/08 | 06/08 | 06/08 | 06/08 | -     | 06/08 + 13/08 |
|      | Sum. – Aut. | -     | 25/09 | 25/09 | 25/09 | 25/09 | 25/09 | -     | 25/09 + 12/09 |
|      | Aut.        | -     | 24/11 | 24/11 | 24/11 | 24/11 | 24/11 | -     | 24/11 + 22/10 |
| 2016 | Win.        | -     | -     | -     | -     | -     | -     | -     | -             |
|      | Spr.        | 12/04 | 12/04 | 22/04 | 22/04 | 22/04 | 22/04 | 29/04 | 22/04 + 29/04 |
|      | Spr. – Sum. | -     | -     | -     | -     | -     | -     | -     | -             |
|      | Sum.        | -     | -     | -     | -     | -     | -     | -     | -             |
|      | Sum. – Aut. | -     | -     | -     | -     | -     | -     | -     | -             |
|      | Aut.        | -     | -     | -     | -     | -     | -     | -     | -             |
| 2017 | Win.        | 07/01 | -     | -     | -     | -     | -     | 24/01 | 16/02 + 14/01 |
|      | Spr.        | 07/04 | 07/04 | 17/04 | 17/04 | 17/04 | 17/04 | 14/05 | 17/04 + 14/05 |
|      | Spr. – Sum. | 17/05 | -     | -     | -     | -     | -     | 03/06 | 27/05 + 03/06 |
|      | Sum.        | 06/07 | -     | -     | -     | -     | -     | 08/07 | 06/07 + 08/07 |
|      | Sum. – Aut. | 12/09 | -     | -     | -     | -     | -     | 26/09 | NA + 26/09    |
|      | Aut.        | 14/10 | -     | -     | -     | -     | -     | 16/10 | 18/11 + 16/10 |
| 2018 | Win.        | 11/02 | 02/01 | 22/01 | 22/01 | 24/01 | 19/01 | -     | 22/01 + 14/01 |
|      | Spr.        | 17/04 | 17/04 | 22/04 | 22/04 | 22/04 | 22/04 | 24/04 | 22/04 + 19/04 |
|      | Spr. – Sum. | 01/06 | 01/06 | 01/06 | 01/06 | 24/05 | 19/05 | -     | 01/06 + 03/06 |
|      | Sum.        | 26/07 | 26/07 | 31/07 | 31/07 | 31/07 | 31/07 | -     | 31/07 + 28/07 |
|      | Sum. – Aut. | 19/09 | 19/09 | 24/09 | 24/09 | 24/09 | 24/09 | -     | 04/09 + 06/09 |
|      | Aut.        | 24/10 | 24/10 | 24/10 | 24/10 | 19/10 | 24/10 | -     | 24/10 + NA    |
| 2019 | Win.        | -     | -     | -     | -     | -     | -     | -     | -             |
|      | Spr.        | 15/04 | 17/04 | 17/04 | 17/04 | 17/04 | 17/04 | 19/04 | 17/04 + 19/04 |
|      | Spr. – Sum. | -     | -     | -     | -     | -     | -     | -     | -             |
|      | Sum.        | -     | -     | -     | -     | -     | -     | -     | -             |
|      | Sum. – Aut. | -     | -     | -     | -     | -     | -     | -     | -             |
|      | Aut.        | -     | -     | -     | -     | -     | -     | -     | -             |

|      |             |       |       |       |       |       |       |       |               |
|------|-------------|-------|-------|-------|-------|-------|-------|-------|---------------|
| 2020 | Win.        | 12/01 | 12/01 | 12/01 | 12/01 | 12/01 | 12/01 | 29/01 | 12/01 + 29/01 |
|      | Spr.        | 06/04 | 11/04 | 11/04 | 11/04 | 11/04 | 11/04 | 08/04 | 11/04 + 08/04 |
|      | Spr. – Sum. | 26/05 | 21/05 | 21/05 | 21/05 | 02/06 | 23/05 | 23/05 | 21/05 + 23/05 |
|      | Sum.        | 25/07 | 25/07 | 25/07 | 25/07 | 25/07 | 25/07 | 27/07 | 25/07 + 27/07 |
|      | Sum. – Aut. | 13/09 | 13/09 | 13/09 | 13/09 | 13/09 | 13/09 | 15/09 | 13/09 + 15/09 |
|      | Aut.        | 13/10 | 08/10 | 28/10 | 28/10 | 28/10 | 28/10 | 10/10 | 28/10 + 10/10 |
| 2021 | Win.        | 26/01 | 16/01 | 16/01 | 16/01 | 25/02 | 16/01 | 13/01 | 16/01 + 13/01 |
|      | Spr.        | 06/04 | 06/04 | 06/04 | 16/04 | 08/04 | 08/04 | 08/04 | 21/04 + 08/04 |
|      | Spr. – Sum. | 19/05 | 10/06 | 10/06 | 31/05 | 28/05 | 28/05 | 18/05 | 15/06 + 18/05 |
|      | Sum.        | 10/07 | 10/07 | 10/07 | 10/07 | 22/07 | 10/07 | 22/07 | 10/07 + 07/07 |
|      | Sum. – Aut. | 13/09 | 13/09 | 13/09 | 13/09 | 13/09 | 13/09 | 20/09 | 13/09 + 20/09 |
|      | Aut.        | 18/10 | 18/10 | 18/10 | 18/10 | 18/10 | 18/10 | 15/10 | 18/10 + 15/10 |

\* Two different images are needed for the PO area because of its size.

**Table S2.** In situ measurement campaigns to validate remote sensing (RS) products from Sentinel-2 satellite images.

| Pit lakes                | Sampling | Coordinate N | Coordinate E | Date – <i>in situ</i> | Date – RS  |
|--------------------------|----------|--------------|--------------|-----------------------|------------|
| Laghi di Cavallara 1     | I        | 44.99801     | 10.63943     | 11/04/2022            | 11/04/2022 |
| Laghi di Cavallara 2     | I        | 44.99971     | 10.63958     | 11/04/2022            | 11/04/2022 |
| Laghi di Cavallara 3     | I        | 44.99921     | 10.64321     | 11/04/2022            | 11/04/2022 |
| Laghi di Cavallara 4     | I        | 44.99815     | 10.64325     | 11/04/2022            | 11/04/2022 |
| Cava Baita               | I        | 44.93918     | 10.64777     | 11/04/2022            | 11/04/2022 |
|                          | II       | 44.93559     | 10.64306     | 11/04/2022            | 11/04/2022 |
| Polo Belgrado Fogarino 1 | I        | 44.94800     | 10.67448     | 11/04/2022            | 11/04/2022 |
| Polo Belgrado Fogarino 2 | I        | 44.95198     | 10.66959     | 13/04/2022            | 13/04/2022 |
|                          | II       | 44.95303     | 10.67153     | 13/04/2022            | 13/04/2022 |
|                          | III      | 44.95168     | 10.67151     | 13/04/2022            | 13/04/2022 |
| Isola degli Internati    | I        | 44.91544     | 10.61520     | 13/04/2022            | 13/04/2022 |
| Cava Malaspina           | I        | 44.91118     | 10.62320     | 13/04/2022            | 13/04/2022 |
|                          | II       | 44.91263     | 10.62333     | 13/09/2022            | 13/09/2022 |
| Ca' Morta                | I        | 45.06416     | 9.77108      | 20/06/2022            | 20/06/2022 |
| Lago Verde               | I        | 45.06013     | 9.77499      | 20/06/2022            | 20/06/2022 |
| Ca' Stanga               | I        | 45.05852     | 9.79616      | 20/06/2022            | 20/06/2022 |
| Bella Venezia            | I        | 45.05166     | 10.03599     | 28/09/2022            | 23/09/2022 |
|                          | II       | 45.05327     | 10.03595     | 28/09/2022            | 23/09/2022 |
|                          | III      | 45.05080     | 10.03601     | 15/06/2023            | 15/06/2023 |

|               |     |          |          |            |            |
|---------------|-----|----------|----------|------------|------------|
|               | IV  | 45.05248 | 10.03609 | 15/06/2023 | 15/06/2023 |
|               | V   | 45.05457 | 10.03616 | 15/06/2023 | 15/06/2023 |
| Polesine Sud  | I   | 45.02177 | 10.06836 | 28/09/2022 | 23/09/2022 |
|               | II  | 45.02237 | 10.06633 | 28/09/2022 | 23/09/2022 |
|               | III | 45.02200 | 10.06744 | 15/06/2023 | 15/06/2023 |
|               | IV  | 45.02269 | 10.06664 | 15/06/2023 | 15/06/2023 |
|               |     |          |          |            |            |
| Polesine Nord | I   | 45.02463 | 10.06557 | 28/09/2022 | 23/09/2022 |
|               | II  | 45.02523 | 10.06797 | 15/06/2023 | 15/06/2023 |
|               | III | 45.02463 | 10.06671 | 15/06/2023 | 15/06/2023 |

**Table S3.** Mean SPM concentrations ( $\text{gm}^{-3}$ ) divided into the four categories (location, dimension, season and quarrying activity) and into the eight subsample areas: Turin (TO), Po and Orba River Park (OR), Milan (MI), Trezzo sull'Adda (TR), Brescia (BS), Mantua (MN), Modena (MO), and along the Po River shaft (PO). Small (S.), medium (M.) and Large (L.). Winter (Win.; January 1 - March 20), spring (Spr.; April 1 - May 15), spring-summer (Spr. – Sum.; May 16 - June 15), summer (Sum.; July 1 - August 31), summer-autumn (Sum. – Aut.; September 1 - October 1) and autumn (Aut.; October 2 - November 31).

|                    |                          | TO  | OR   | MI  | TR  | BS   | MN   | MO   | PO   | Active | Ceased | TOT  |
|--------------------|--------------------------|-----|------|-----|-----|------|------|------|------|--------|--------|------|
| Location           | <i>Isolated</i>          | 6.4 | 9.7  | 7.0 | 7.4 | 9.3  | 14.1 | 9.1  | 16.8 | 12.4   | 8.9    | 10.0 |
|                    | <i>Proximity</i>         | 7.7 | 13.4 | 8.2 | 7.1 | -    | 8.7  | 14.6 | 18.7 | 14.5   | 12.8   | 13.2 |
|                    | <i>Connected</i>         | 5.5 | -    | -   | -   | -    | 6.5  | -    | 18.8 | 21.4   | 15.7   | 16.5 |
| Dimension          | <i>Small (&lt;5 ha)</i>  | 7.4 | 9.3  | 7.3 | 8.2 | 9.2  | 13.6 | 14.4 | 20.1 | 18.2   | 11.4   | 12.6 |
|                    | <i>Medium (5-10 ha)</i>  | 7.0 | 14.8 | 6.9 | -   | 11.0 | 9.5  | 12.1 | 15.4 | 14.3   | 9.3    | 10.8 |
|                    | <i>Large (&gt;10 ha)</i> | 7.6 | 9.6  | 7.1 | 5.2 | 8.3  | 6.7  | 11.9 | 17.0 | 10.7   | 9.7    | 10.1 |
| Season             | <i>Winter</i>            | 9.4 | 12.1 | 9.4 | 8.0 | 11.9 | 11.1 | 12.3 | 18.5 | 15.1   | 11.4   | 12.4 |
|                    | <i>Spring</i>            | 6.6 | 12.8 | 6.8 | 7.8 | 8.3  | 12.0 | 12.8 | 18.4 | 12.8   | 10.5   | 11.2 |
|                    | <i>Spring – Summer</i>   | 7.5 | 10.1 | 5.8 | 6.7 | 7.3  | 10.9 | 12.9 | 14.3 | 11.6   | 9.0    | 9.7  |
|                    | <i>Summer</i>            | 6.6 | 7.8  | 6.1 | 5.7 | 9.1  | 10.9 | 12.4 | 17.1 | 12.2   | 9.6    | 10.4 |
|                    | <i>Summer – Autumn</i>   | 7.5 | 11.6 | 7.7 | 6.6 | 9.0  | 13.4 | 16.2 | 17.1 | 11.7   | 11.8   | 11.7 |
|                    | <i>Autumn</i>            | 7.6 | 12.4 | 7.0 | 8.3 | 10.2 | 13.2 | 16.5 | 20.5 | 14.4   | 12.1   | 12.7 |
| Quarrying activity | <i>Active</i>            | 8.9 | 15.0 | 8.3 | 6.7 | 12.0 | -    | -    | 20.4 |        |        | 13.3 |
|                    | <i>Ceased</i>            | 6.4 | 9.7  | 6.4 | 8.4 | 7.5  | 9.7  | 13.6 | 16.6 |        |        | 10.6 |

**Table S4.** Mean  $\lambda_{\text{dom}}$  (nm) divided into the four categories (location, dimension, season and quarrying activity) and into the eight subsample areas: Turin (TO), Po and Orba River Park (OR), Milan (MI), Trezzo sull'Adda (TR), Brescia (BS), Mantua (MN), Modena

(MO), and along the Po River shaft (PO). Small (S.), medium (M.) and Large (L.). Winter (Win.; January 1 - March 20), spring (Spr.; April 1 - May 15), spring-summer (Spr. – Sum.; May 16 - June 15), summer (Sum.; July 1 - August 31), summer-autumn (Sum. – Aut.; September 1 - October 1) and autumn (Aut.; October 2 - November 31).

|                    |                          | TO  | OR  | MI  | TR  | BS  | MN  | MO  | PO  | Active | Ceased | TOT |
|--------------------|--------------------------|-----|-----|-----|-----|-----|-----|-----|-----|--------|--------|-----|
| Location           | <i>Isolated</i>          | 571 | 569 | 568 | 562 | 565 | 571 | 573 | 569 | 564    | 569    | 567 |
|                    | <i>Proximity</i>         | 570 | 570 | 567 | 563 | -   | 571 | 571 | 570 | 568    | 571    | 570 |
|                    | <i>Connected</i>         | 570 | -   | -   | -   | -   | 572 | -   | 571 | 572    | 571    | 571 |
| Dimension          | <i>Small (&lt;5 ha)</i>  | 573 | 570 | 571 | 563 | 566 | 571 | 572 | 570 | 565    | 571    | 570 |
|                    | <i>Medium (5-10 ha)</i>  | 570 | 569 | 569 | -   | 566 | 570 | 570 | 570 | 568    | 569    | 569 |
|                    | <i>Large (&gt;10 ha)</i> | 567 | 569 | 566 | 561 | 560 | 571 | 569 | 568 | 565    | 568    | 566 |
| Season             | <i>Winter</i>            | 573 | 572 | 571 | 568 | 569 | 572 | 572 | 571 | 569    | 572    | 571 |
|                    | <i>Spring</i>            | 569 | 568 | 567 | 558 | 563 | 570 | 570 | 568 | 564    | 569    | 567 |
|                    | <i>Spring – Summer</i>   | 569 | 567 | 565 | 555 | 557 | 570 | 570 | 569 | 562    | 567    | 565 |
|                    | <i>Summer</i>            | 568 | 568 | 565 | 560 | 564 | 570 | 572 | 568 | 564    | 569    | 567 |
|                    | <i>Summer – Autumn</i>   | 570 | 571 | 569 | 566 | 566 | 571 | 573 | 570 | 567    | 571    | 569 |
|                    | <i>Autumn</i>            | 571 | 571 | 571 | 567 | 568 | 573 | 572 | 571 | 568    | 571    | 570 |
| Quarrying activity | <i>Active</i>            | 567 | 569 | 566 | 559 | 562 | -   | -   | 568 |        |        | 566 |
|                    | <i>Ceased</i>            | 572 | 569 | 569 | 566 | 567 | 571 | 571 | 570 |        |        | 570 |

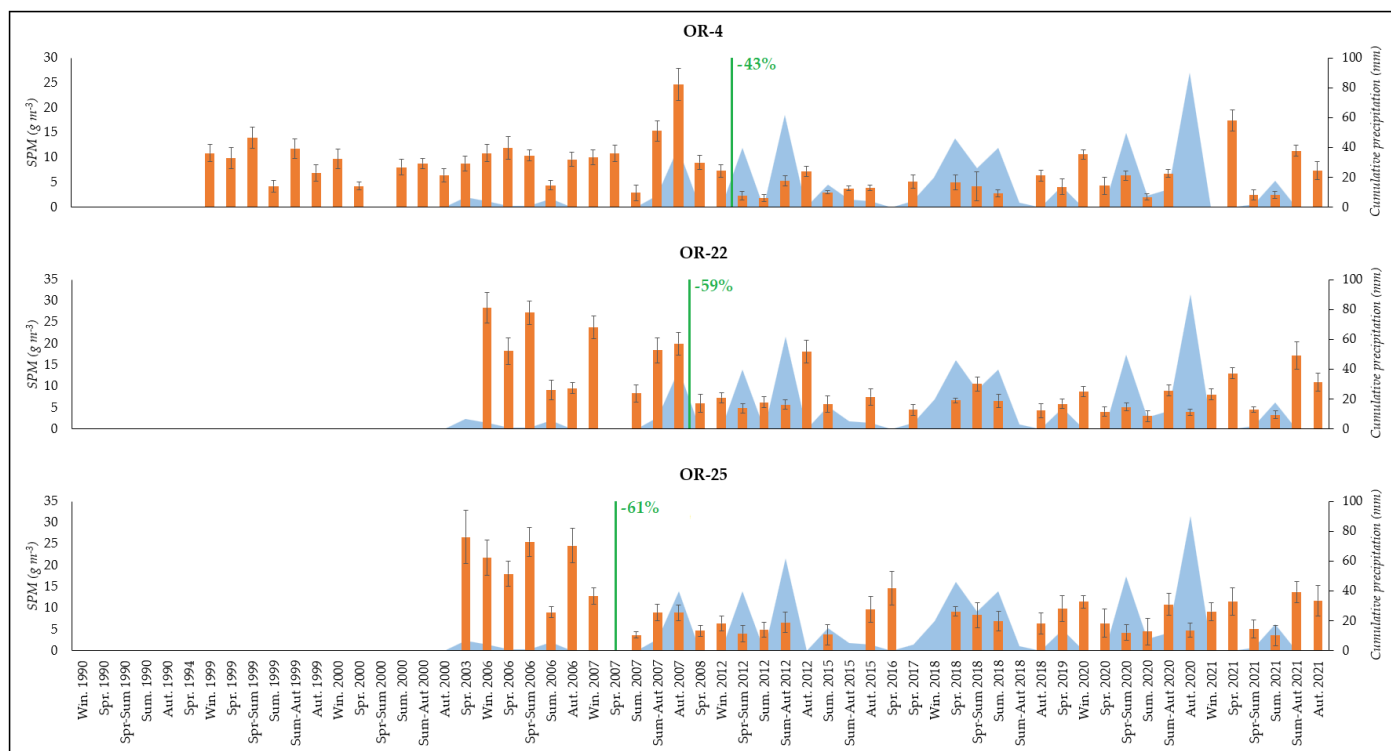

**Figure S1.** Temporal evolution of SPM concentration (orange columns) in some pit lakes in the OR area (Po and Orba River Park) in relation to cumulative precipitation (blue polygons) in the 7 days prior to satellite acquisitions. The green line indicates the end of quarrying activities and the mean percentage decrease in SPM concentrations after that event.

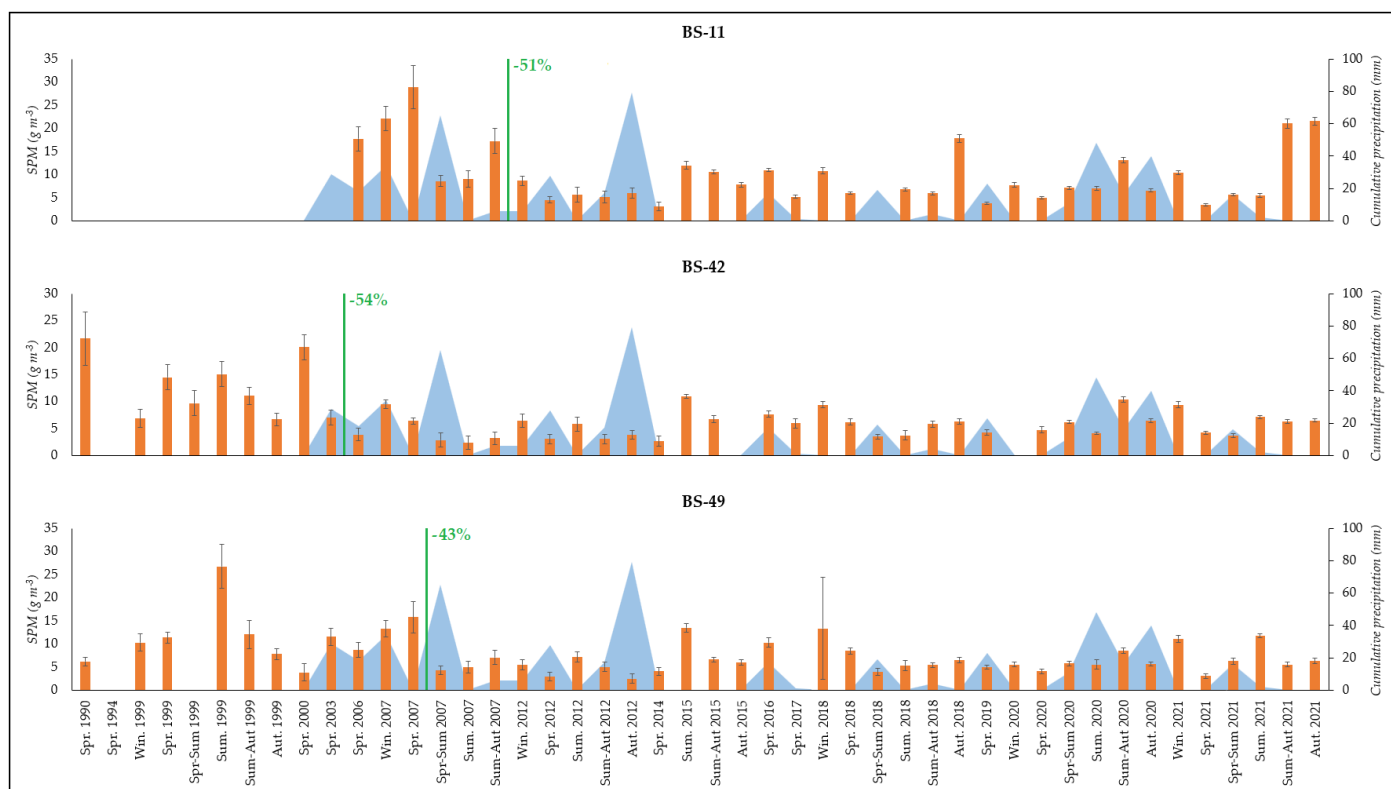

**Figure S2.** Temporal evolution of SPM concentration (orange columns) in some pit lakes in the BS area (Brescia) in relation to cumulative precipitation (blue polygons) in the 7 days prior to satellite acquisitions. The green line indicates the end of quarrying activities and the mean percentage decrease in SPM concentrations after that event.



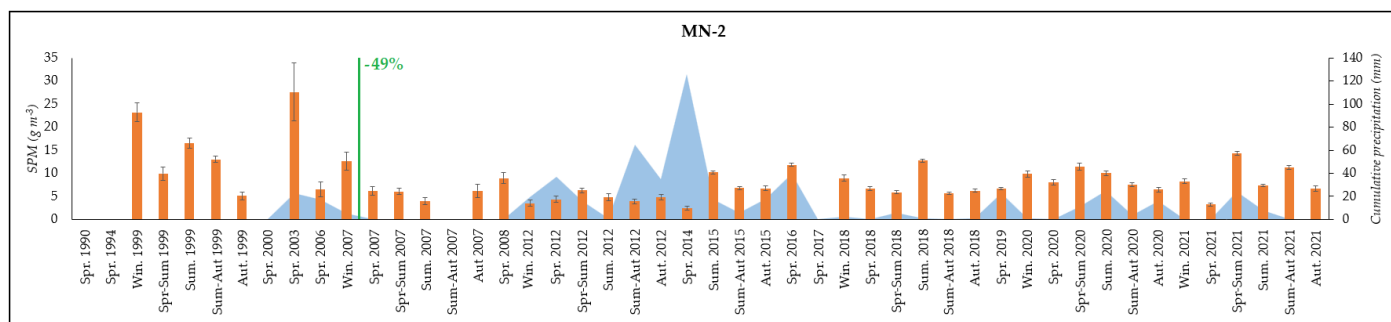

**Figure S3.** Temporal evolution of SPM concentration (orange columns) of MN-2 pit lake in the MN area (Mantua) in relation to cumulative precipitation (blue polygons) in the 7 days prior to satellite acquisitions. The green line indicates the end of quarrying activities and the mean percentage decrease in SPM concentrations after that event.

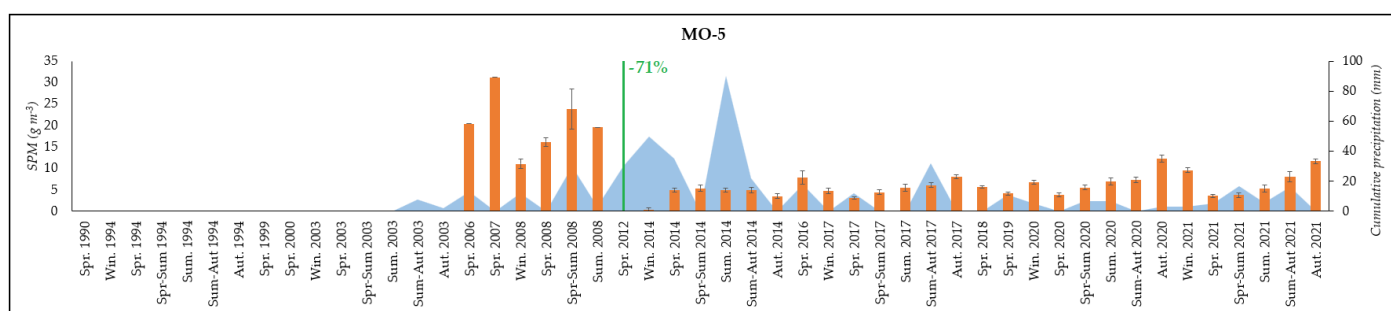

**Figure S4.** Temporal evolution of SPM concentration (orange columns) of MO-5 pit lake in the MO area (Modena) in relation to cumulative precipitation (blue polygons) in the 7 days prior to satellite acquisitions. The green line indicates the end of quarrying activities and the mean percentage decrease in SPM concentrations after that event.

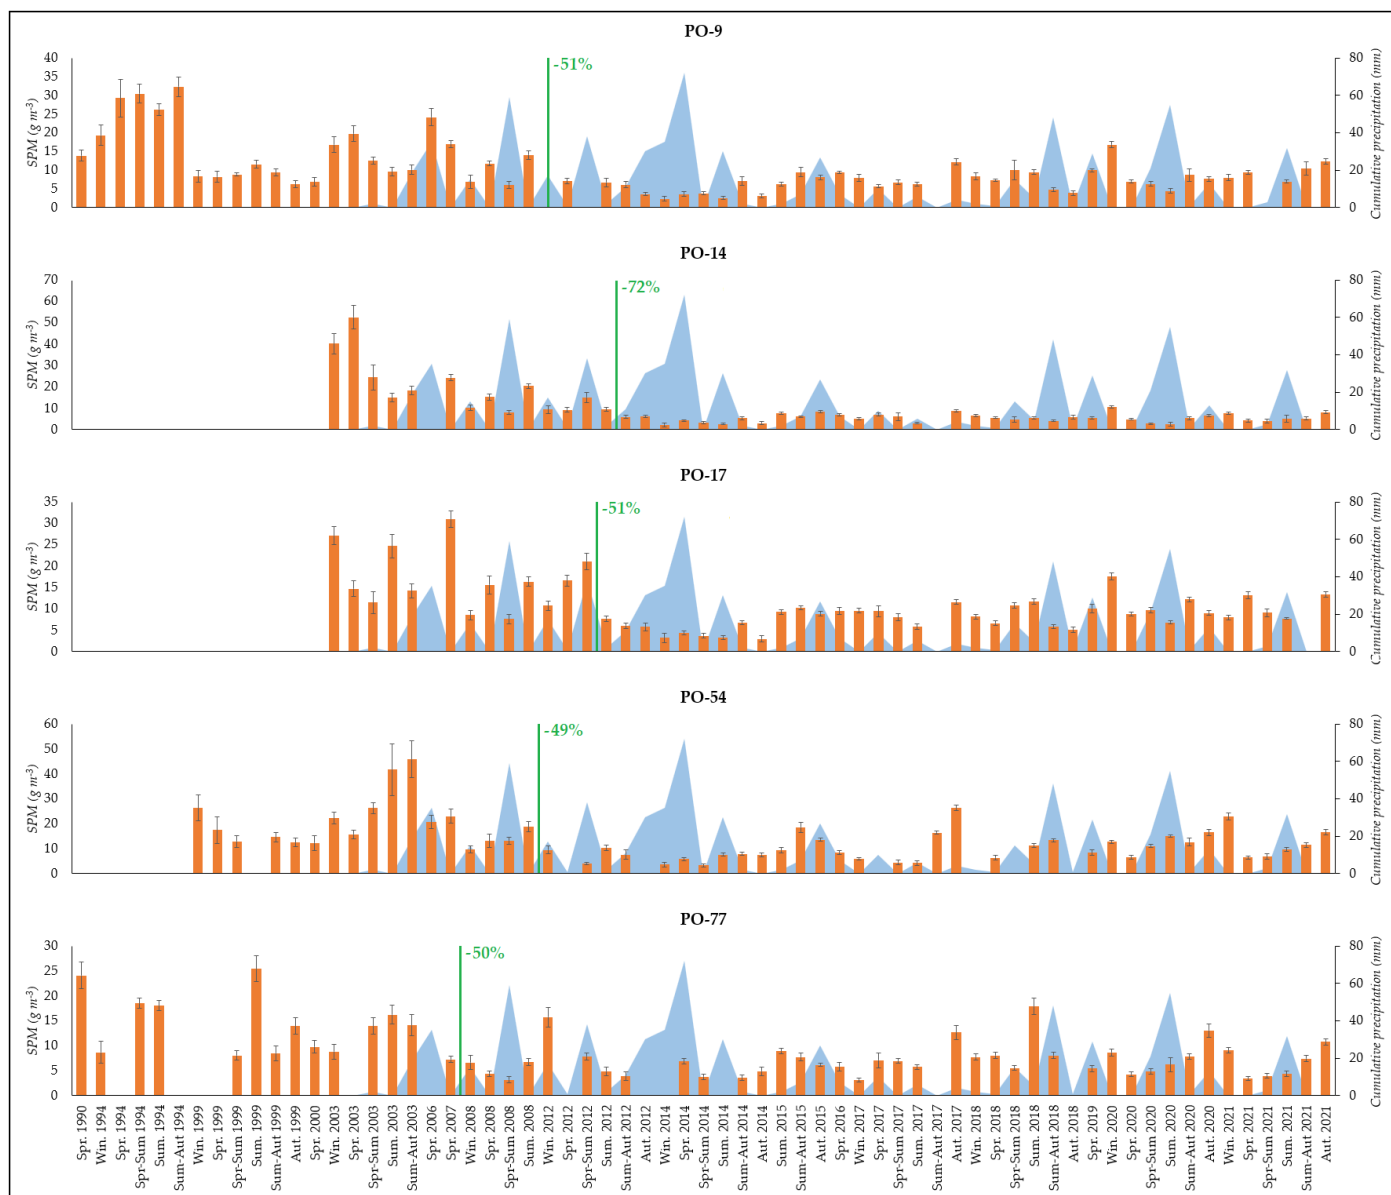

**Figure S5.** Temporal evolution of SPM concentration (orange columns) of some pit lakes in the PO area (Po River shaft) in relation to cumulative precipitation (blue polygons) in the 7 days prior to satellite acquisitions. The green line indicates the end of quarrying activities and the mean percentage decrease in SPM concentrations after that event.
